# Supplementary material for: Body Condition and Breeding of Urban Red Squirrels: Comparison of Two Populations Affected by Different Levels of Urbanization
Source: MDPI journal article supplement (doi:10.3390/ani12233246), 2022-11-23
Supplement: s1 [file s1]

## Supplementary material 1

Table S1. Effects of a site (SITE), season (SEASON), and foot length (FOOT) on body mass of squirrels in a general linear mixed model, \* reference category.

| Source          | <i>B</i> | <i>SE</i> | <i>t</i> | <i>p</i> | <i>Lower CI</i> | <i>Upper CI</i> |
|-----------------|----------|-----------|----------|----------|-----------------|-----------------|
| Intercept       | 261.18   | 27.76     | 9.41     | <0.001*  | 206.57          | 315.78          |
| SITE (Łazienki) | -15,68   | 5.60      | -2.80    | 0.006*   | -26.77          | -4.58           |
| SITE (Natolin)  | 0*       |           |          |          |                 |                 |
| SEASON (winter) | -10.28   | 3.80      | -2.71    | 0.007*   | -17.76          | -2.80           |
| SEASON (autumn) | -10.57   | 3.17      | -3.33    | <0.001*  | -16,81          | -4.33           |
| SEASON (summer) | -7.98    | 3,95      | -2.02    | 0.044*   | -15.75          | -0.22           |
| SEASON (spring) | 0*       |           |          |          |                 |                 |
| FOOT            | 1.84     | 0.51      | 3,64     | <0.001*  | 0.85            | 2.84            |

Table S2. Effects of site (SITE) and season (SEASON) on body condition of squirrels in a general linear mixed model, \* - reference category.

| Source          | <i>B</i> | <i>SE</i> | <i>t</i> | <i>p</i> | <i>Lower CI</i> | <i>Upper CI</i> |
|-----------------|----------|-----------|----------|----------|-----------------|-----------------|
| Intercept       | 0.02     | 0.01      | 3.35     | <0.001*  | 0.01            | 0.04            |
| SITE (Łazienki) | -0,02    | 0.01      | -3.17    | 0.002*   | -0.03           | -0.01           |
| SITE (Natolin)  | 0*       |           |          |          |                 |                 |
| SEASON (winter) | -0.01    | 0.01      | -2.02    | 0.043*   | -0.02           | 0.00            |
| SEASON (autumn) | -0.02    | 0.00      | -3.45    | <0.001*  | -0.02           | -0.01           |
| SEASON (summer) | -0.01    | 0.01      | -1.91    | 0.057    | -0.02           | 0.00            |
| SEASON (spring) | 0*       |           |          |          |                 |                 |

Table S3. Effects of site (SITE), season (SEASON) and body condition (CONDITION) on sexual activity of red squirrels in generalized linear binary model, \* - interaction.

| Source          | <i>B</i> | <i>SE</i> | <i>t</i> | <i>p</i> | <i>Exp (B)</i>      | <i>Lower CI</i> | <i>Upper CI</i>     |
|-----------------|----------|-----------|----------|----------|---------------------|-----------------|---------------------|
| Intercept       | 0.27     | 1.47      | -0.19    | 0.853    | 1.31                | 0.73            | 23.42               |
| SITE (Natolin)  | -1,03    | 0.46      | -2.24    | 0.026*   | 0.36                | 0.04            | 0.30                |
| SITE (Łazienki) | 0*       |           |          |          |                     |                 |                     |
| SEASON (winter) | -0.49    | 0.38      | -1.30    | 0.195    | 0.61                | 0.29            | 1.29                |
| SEASON (autumn) | -2.75    | 0.46      | -5.99    | <0.001*  | 0.06                | 0.03            | 0.16                |
| SEASON (summer) | -2.30    | 0.55      | -4.14    | <0.001*  | 0.10                | 0.03            | 0.30                |
| SEASON (spring) | 0*       |           |          |          |                     |                 |                     |
| CONDITION       | 9.38     | 4.37      | 2,15     | 0.033*   | 119*10 <sup>2</sup> | 2.18            | 646*10 <sup>5</sup> |
